# Supplementary material for: Development of detection method for novel fusion gene using GeneChip exon array
Source: PubMed Central journal article supplement (PMC3937068; doi:10.1186/2043-9113-4-3), 2014-02-18
Supplement: 2043-9113-4-3-S1.pdf [file 2043-9113-4-3-S1.pdf]

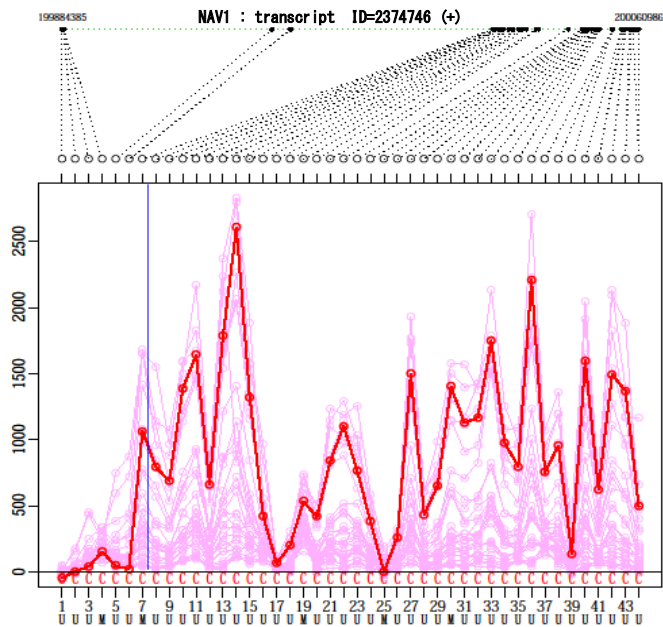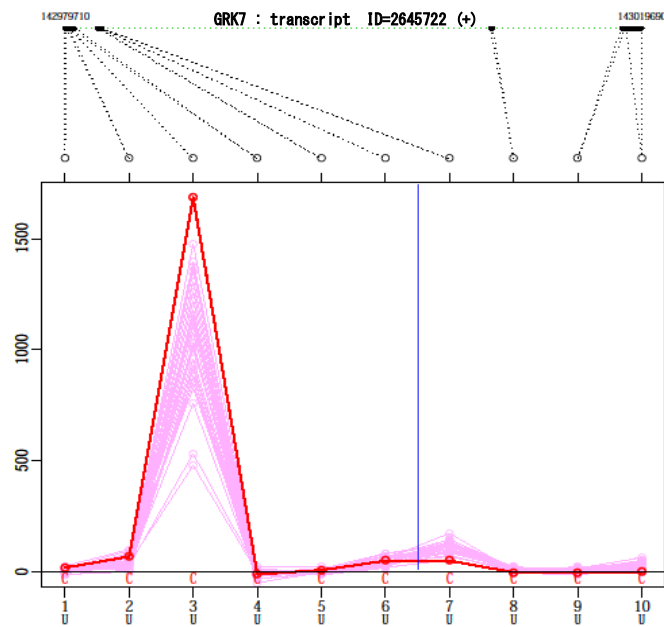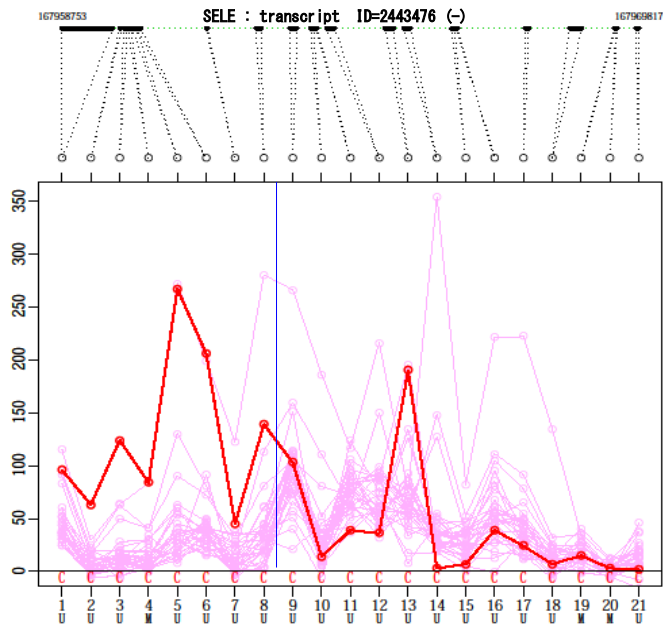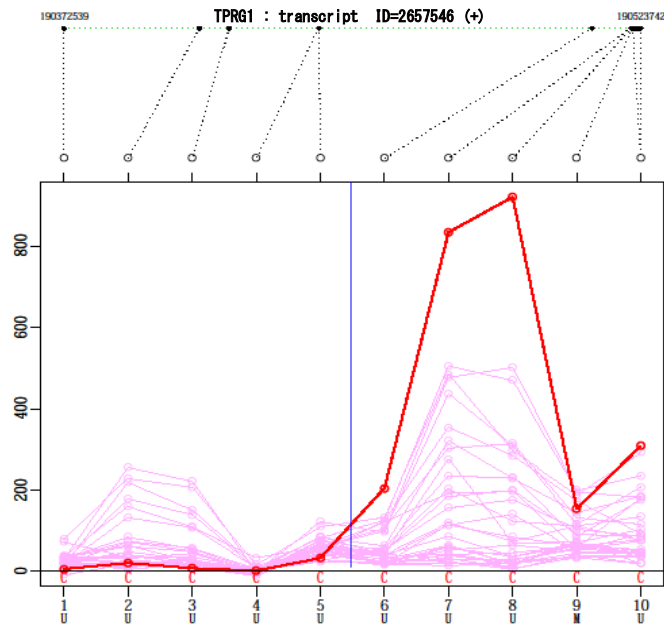

**Additional file 1 -1/5**  
 selected genes by the program in 24 breast cancer cell lines

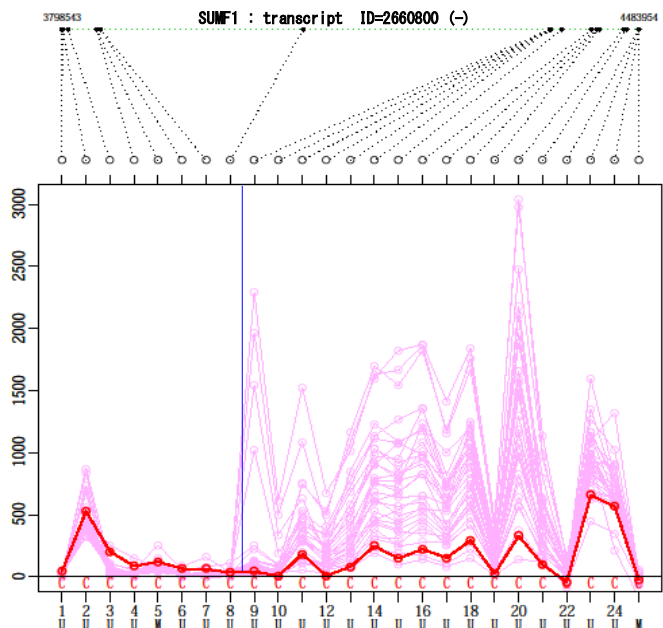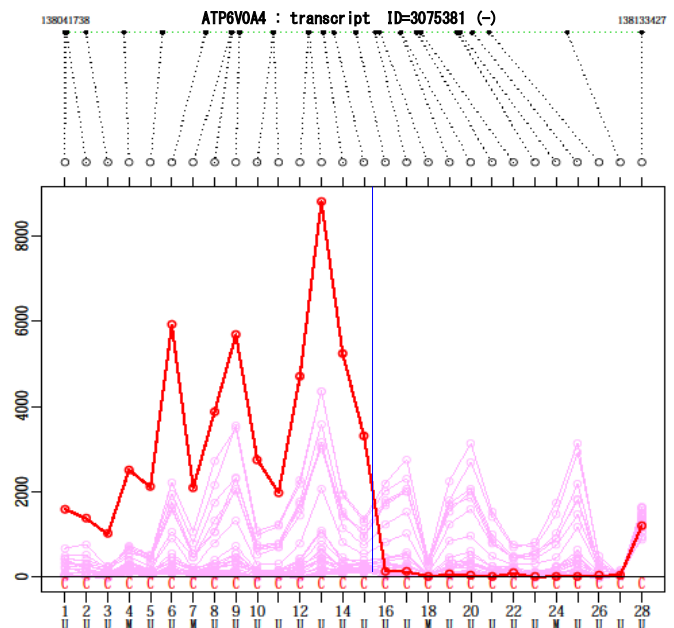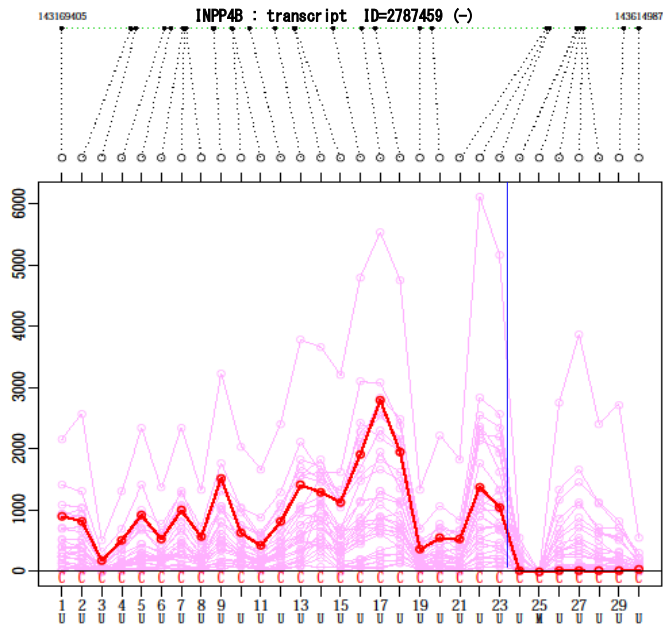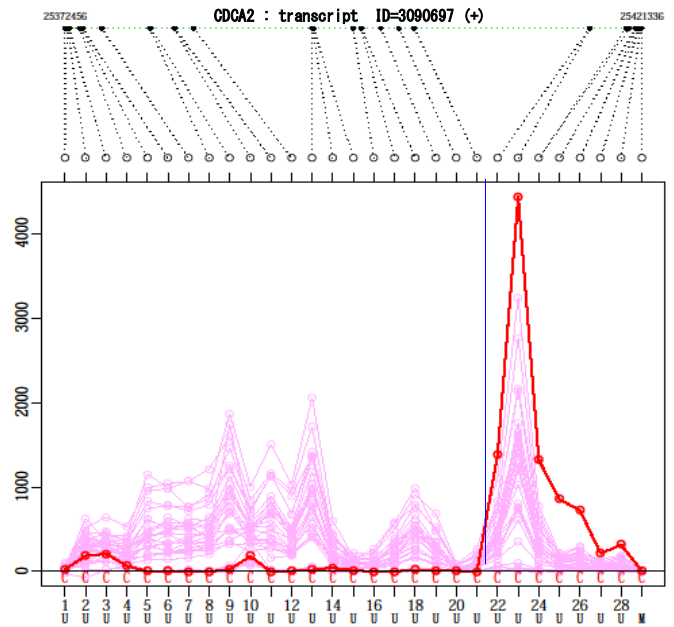

**Additional file 1 -2/5**  
 selected genes by the program in 24 breast cancer cell lines

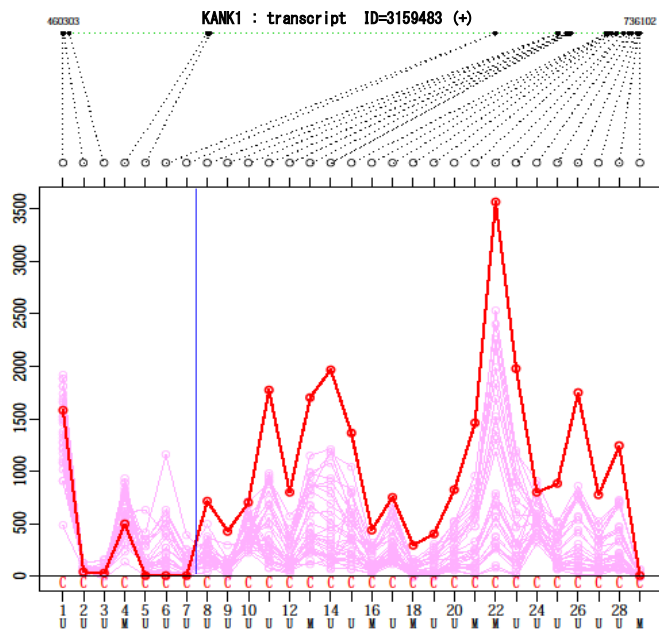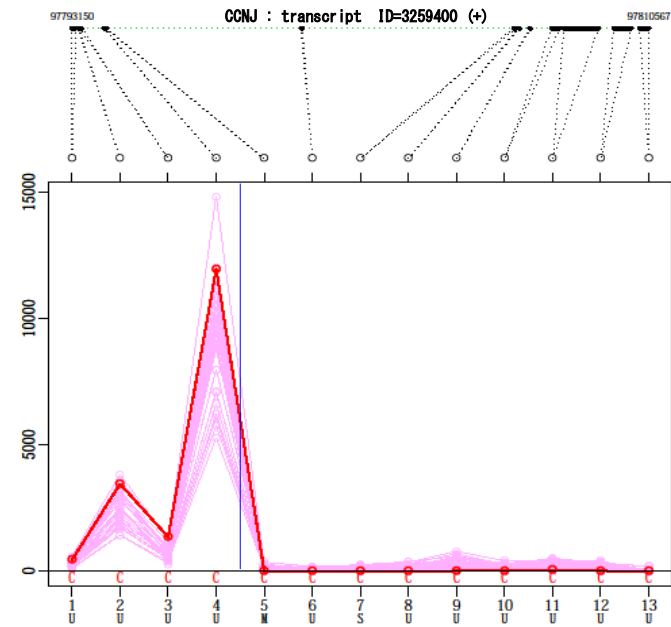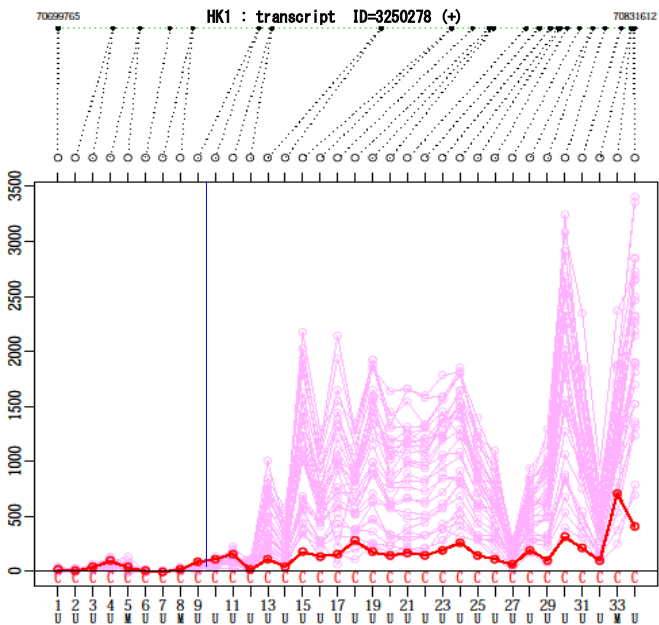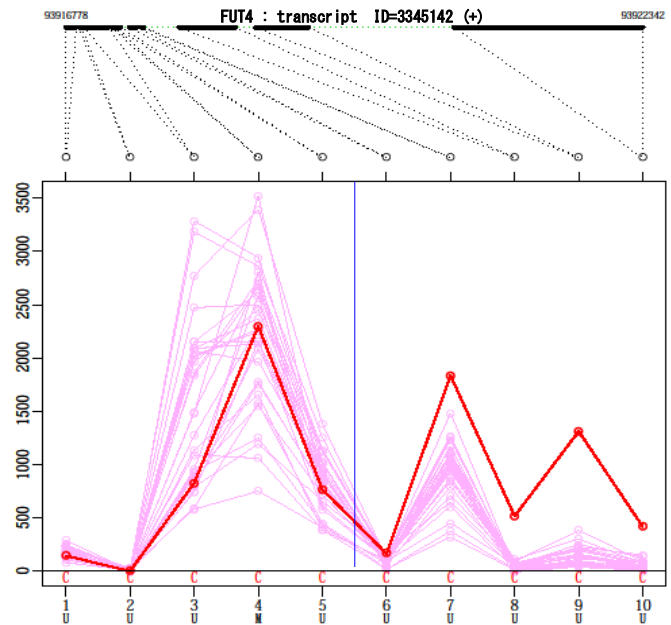

**Additional file 1 -3/5**  
 selected genes by the program in 24 breast cancer cell lines



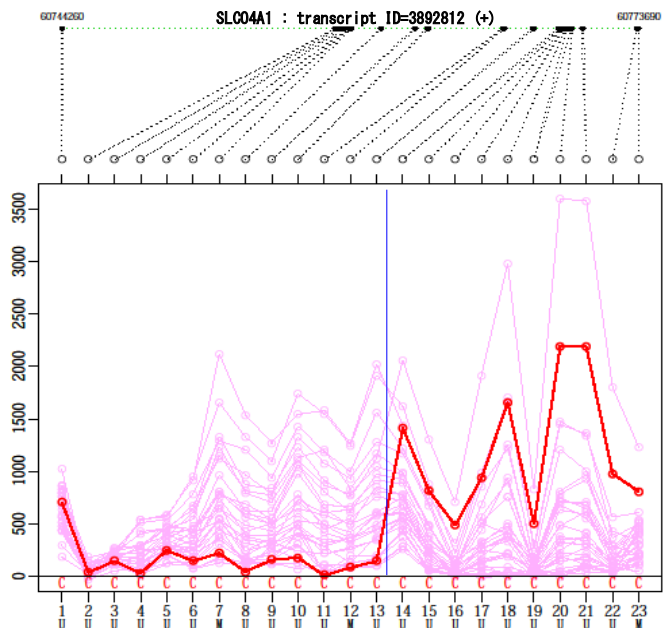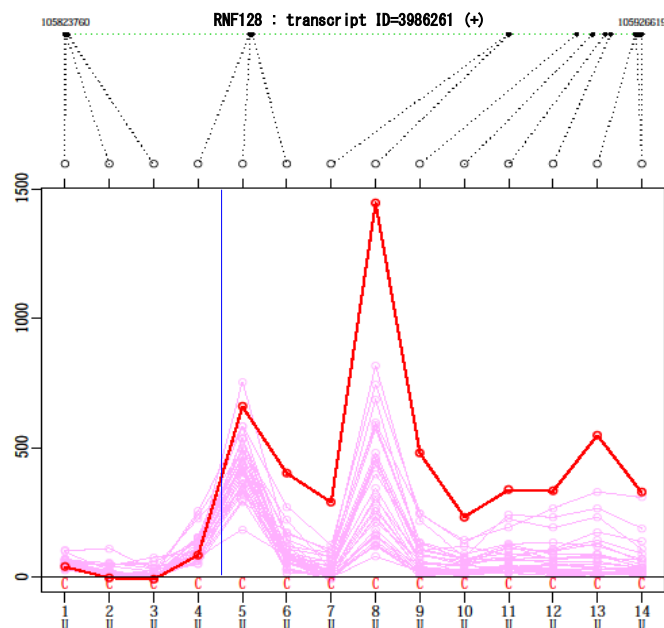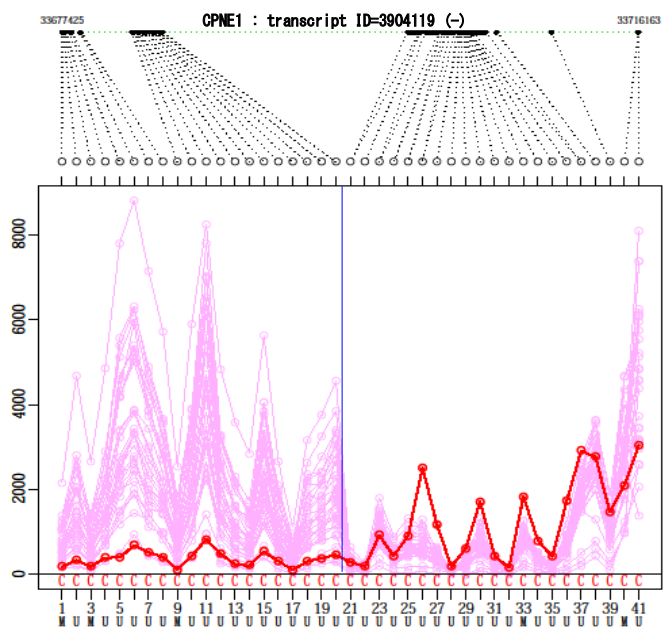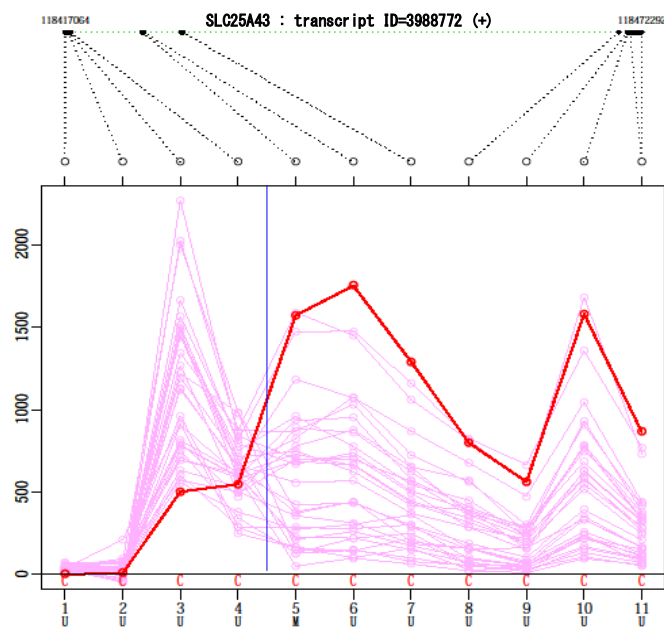

**Additional file 1 -5/5**  
 selected genes by the program in 24 breast cancer cell lines
