# Supplementary material for: Development of detection method for novel fusion gene using GeneChip exon array
Source: PubMed Central journal article supplement (PMC3937068; doi:10.1186/2043-9113-4-3), 2014-02-18
Supplement: 2043-9113-4-3-S2.pdf [file 2043-9113-4-3-S2.pdf]

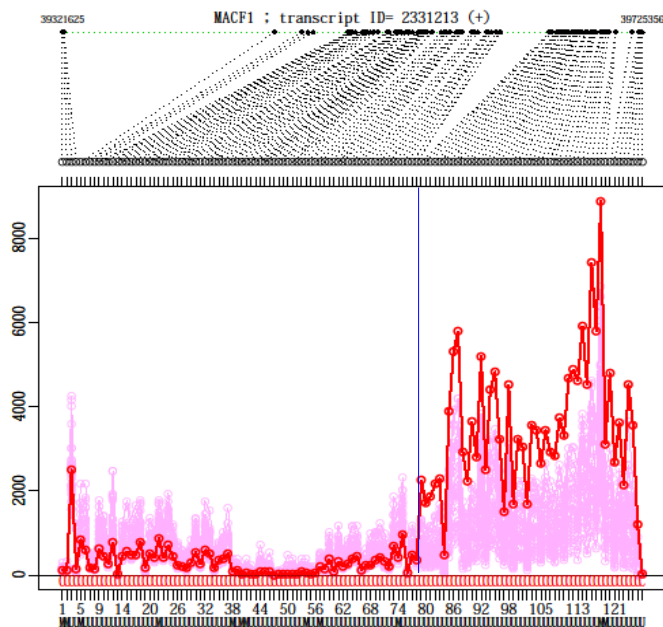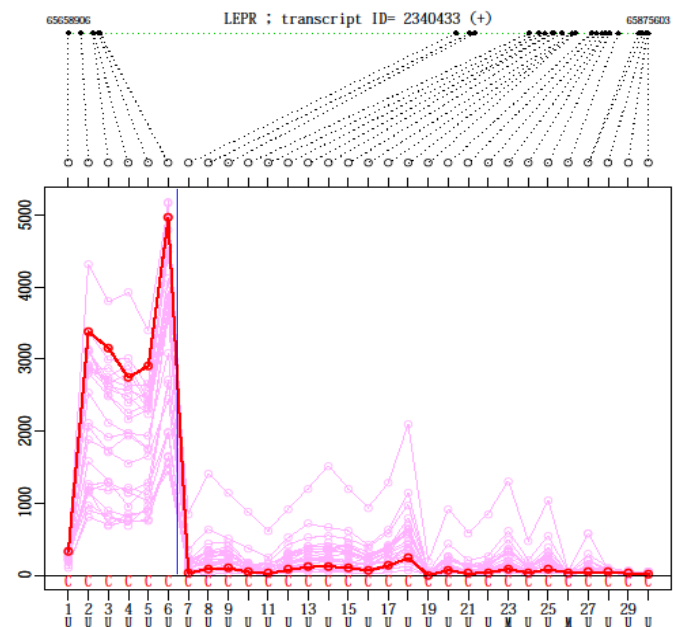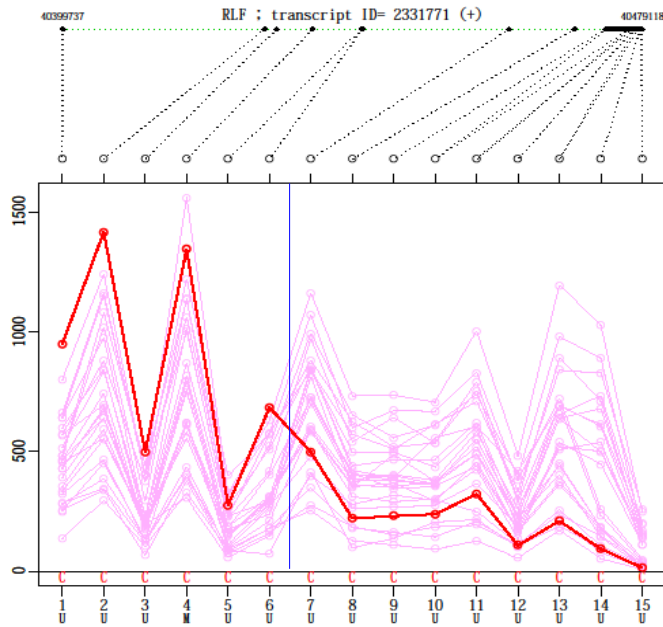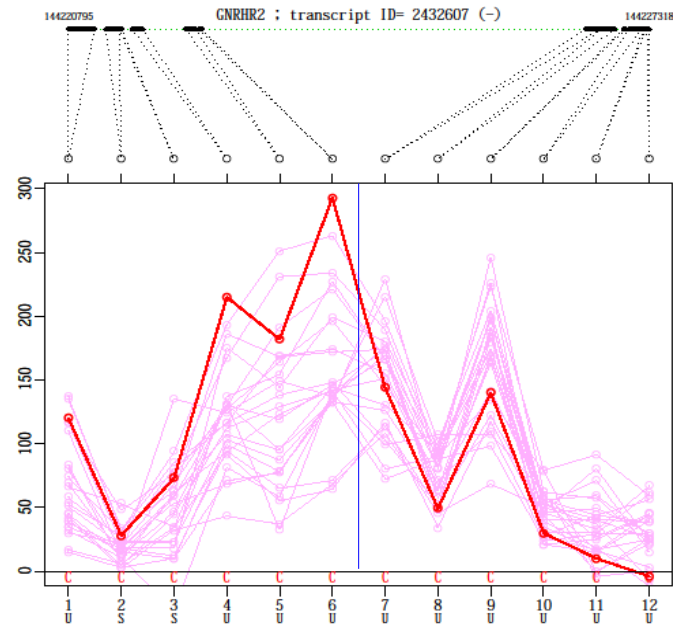

**Additional file 2 -1/6**  
 selected genes by the program in 20 pancreatic cell lines

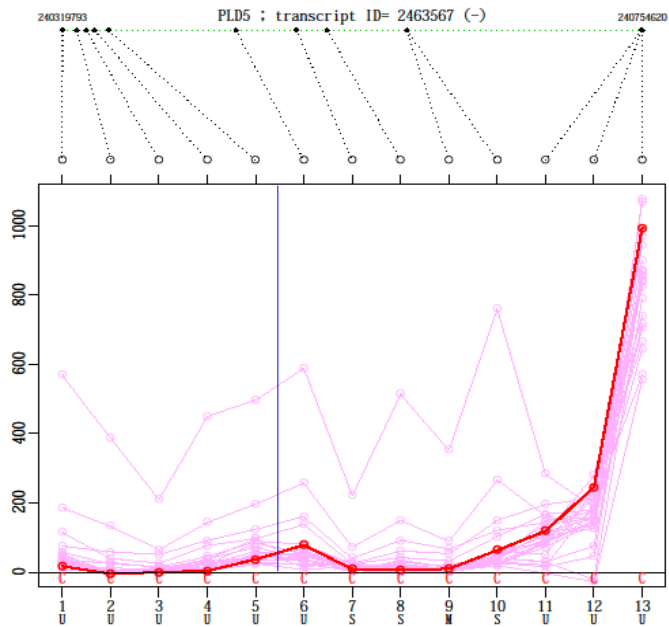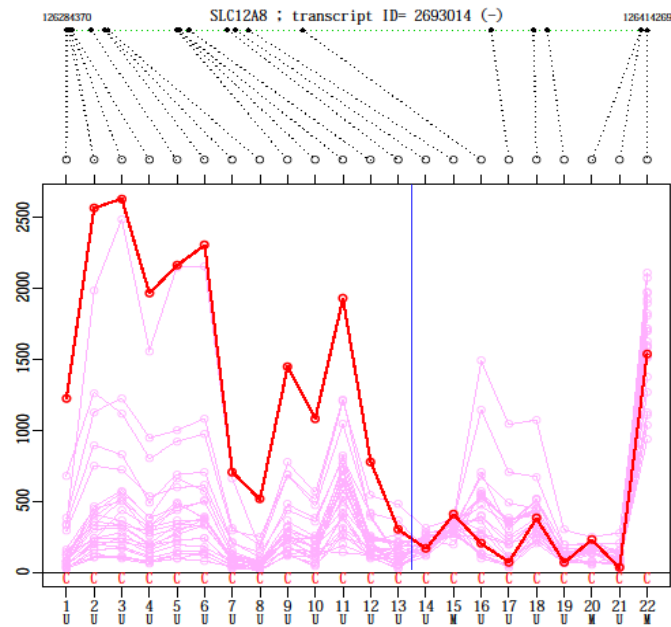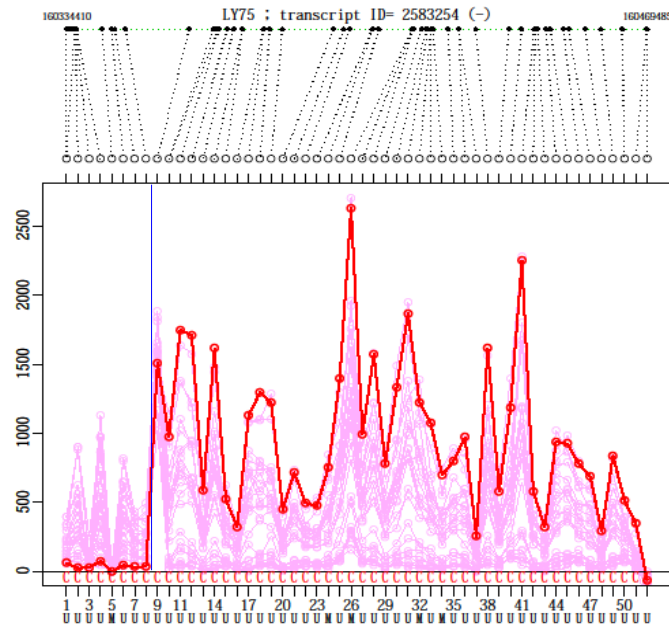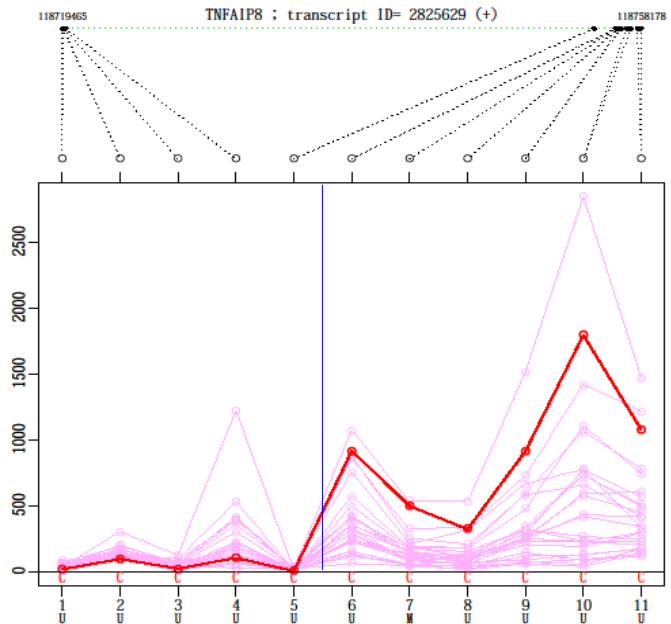

**Additional file 2 -2/6**

selected genes by the program in 20 pancreatic cell lines

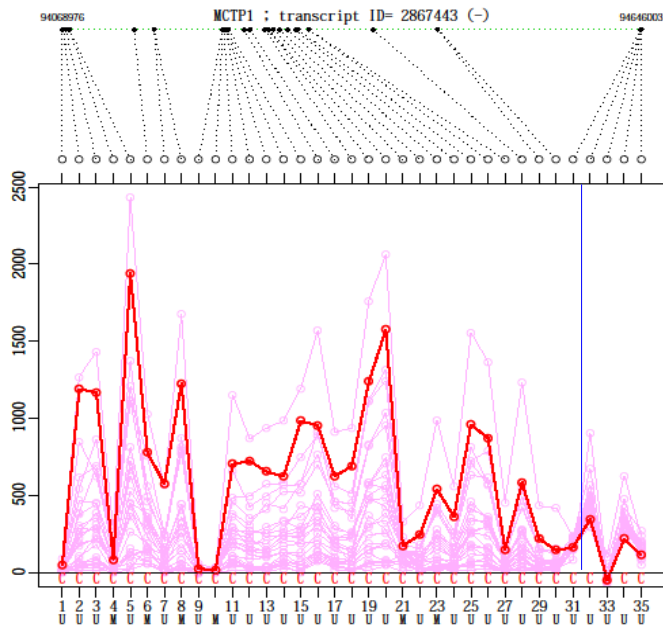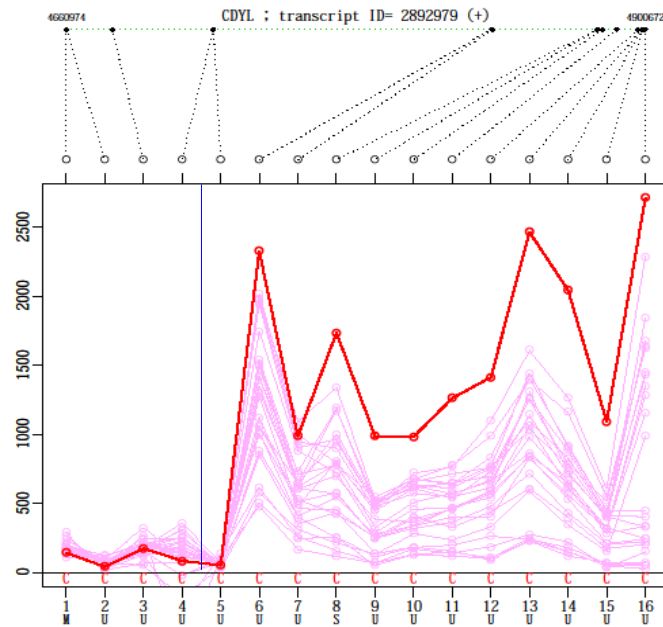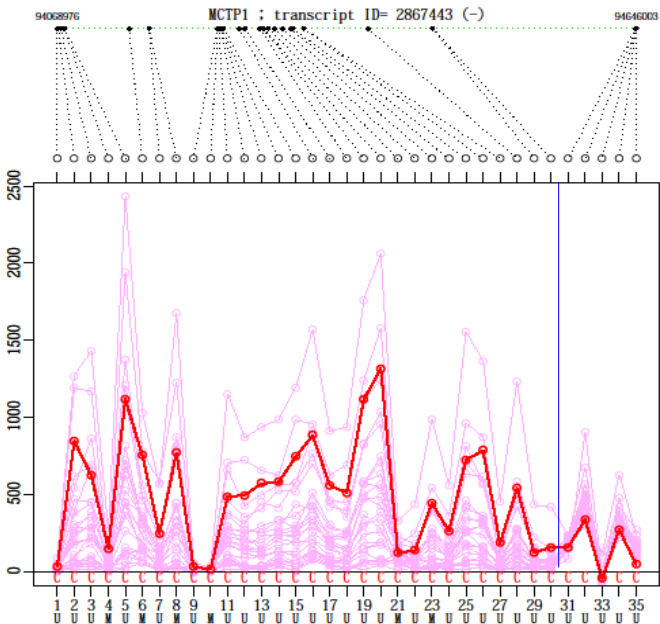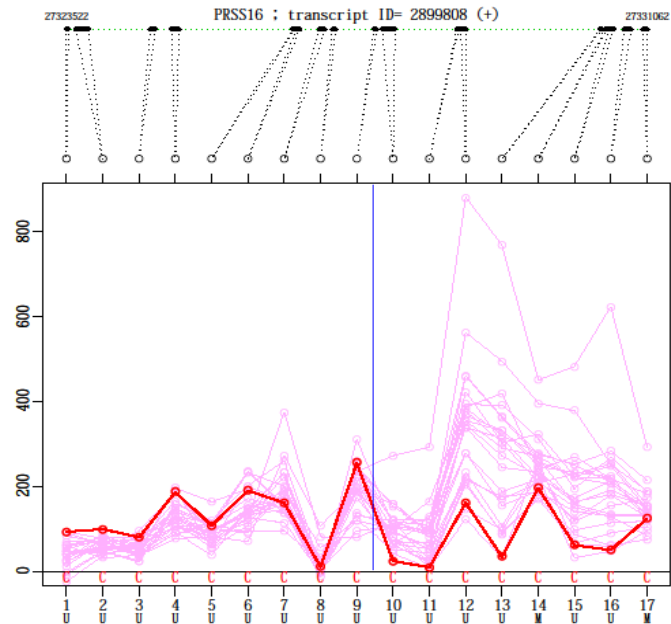

**Additional file 2 -3/6**  
 selected genes by the program in 20 pancreatic cell lines

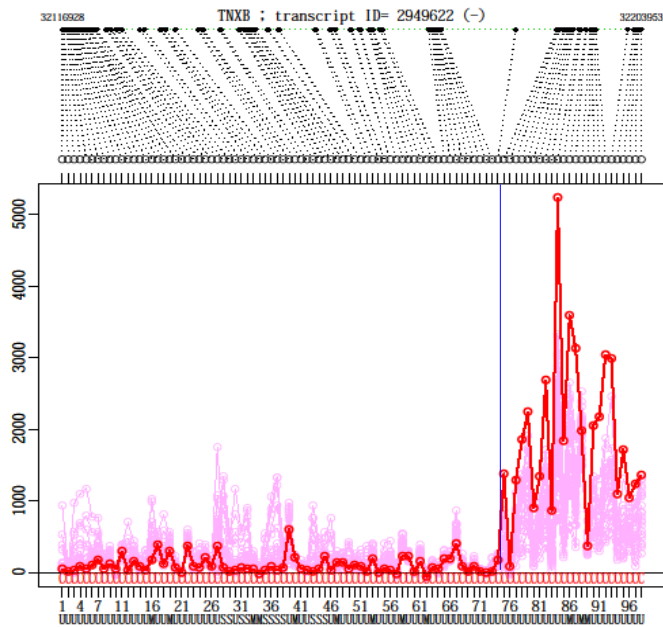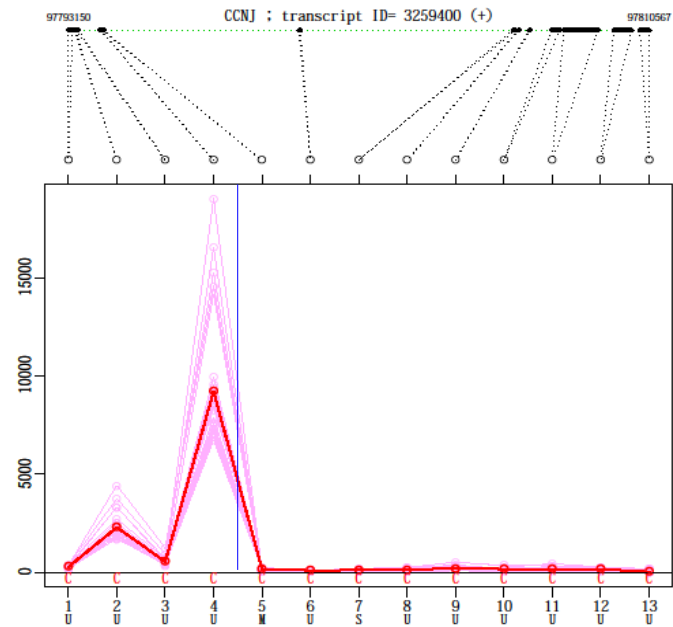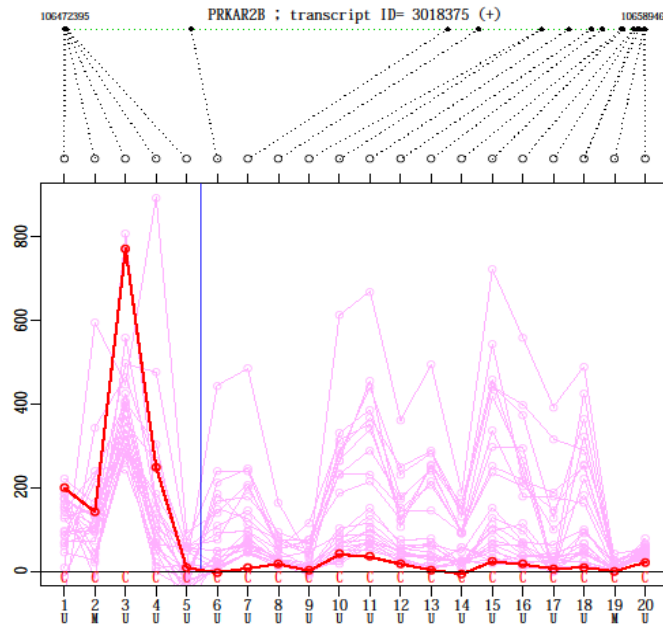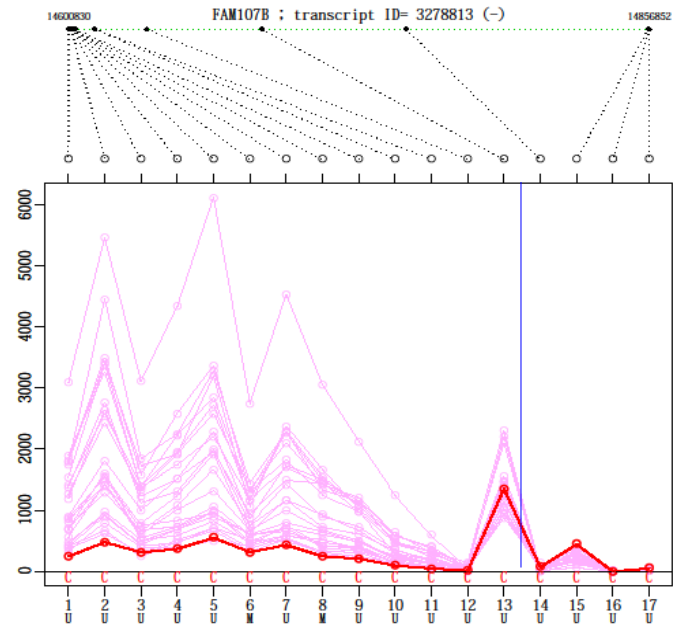

**Additional file 2 -4/6**  
 selected genes by the program in 20 pancreatic cell lines

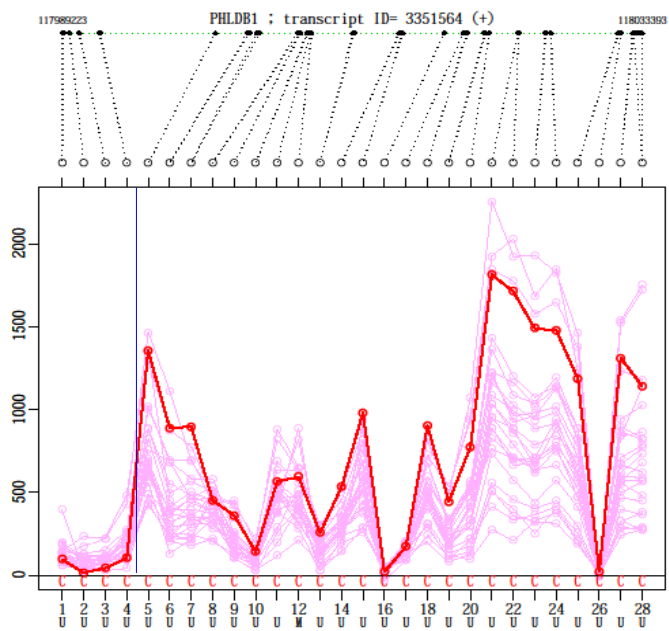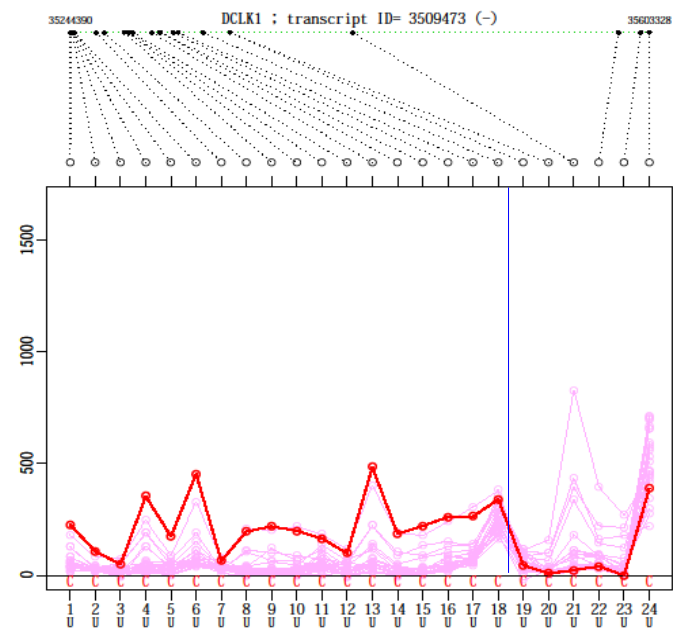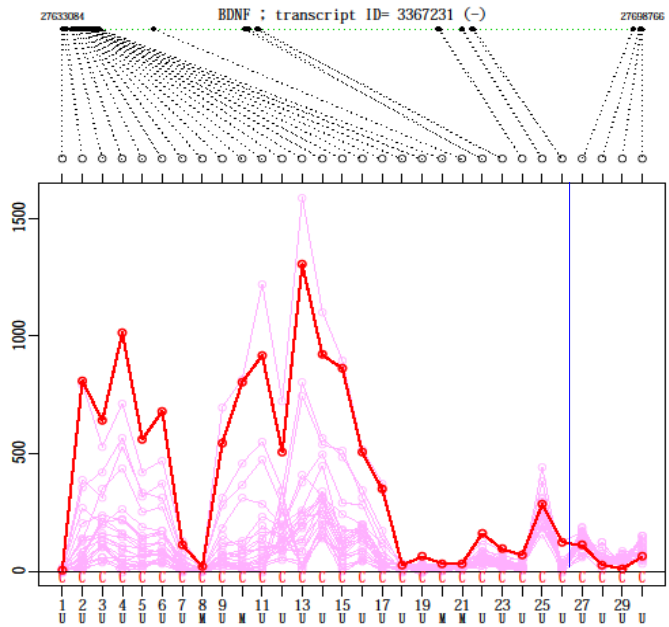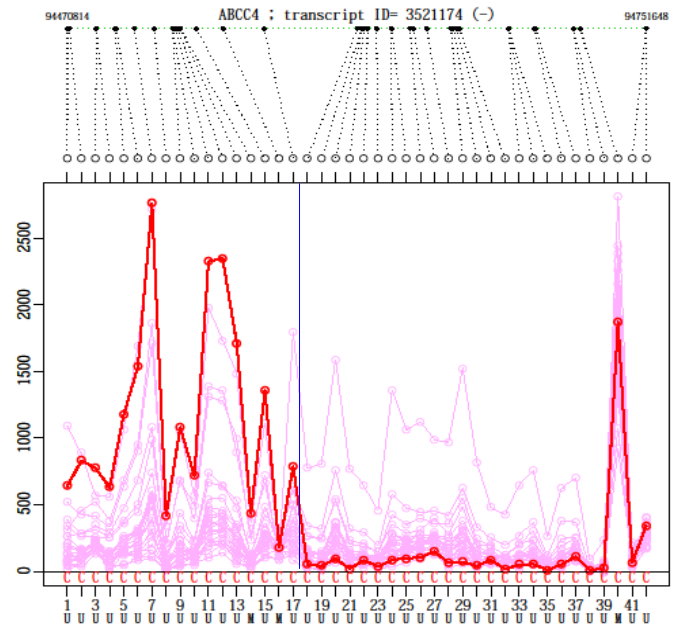

**Additional file 2 -5/6**  
 selected genes by the program in 20 pancreatic cell lines

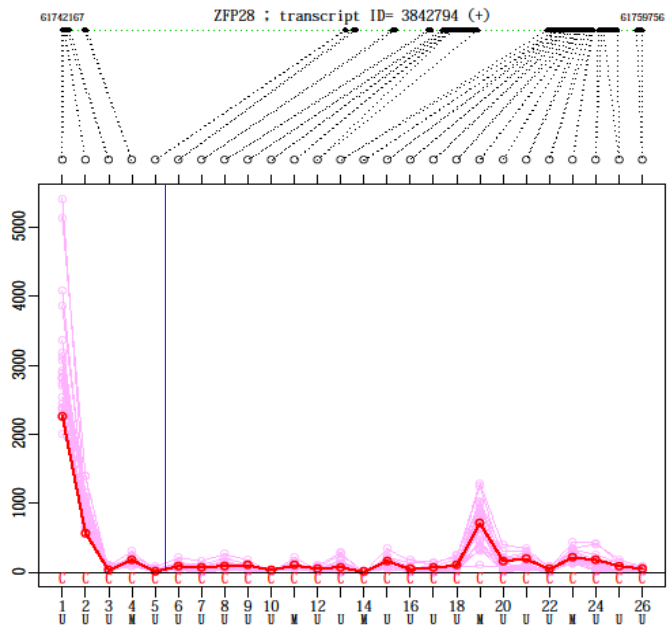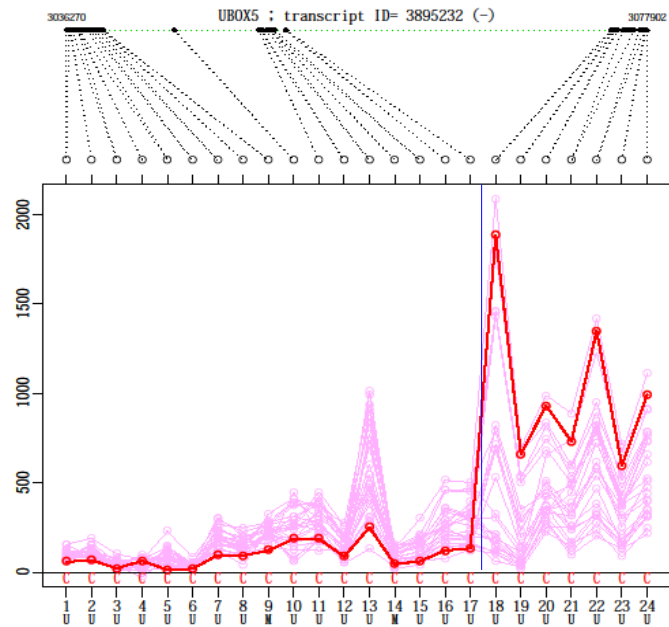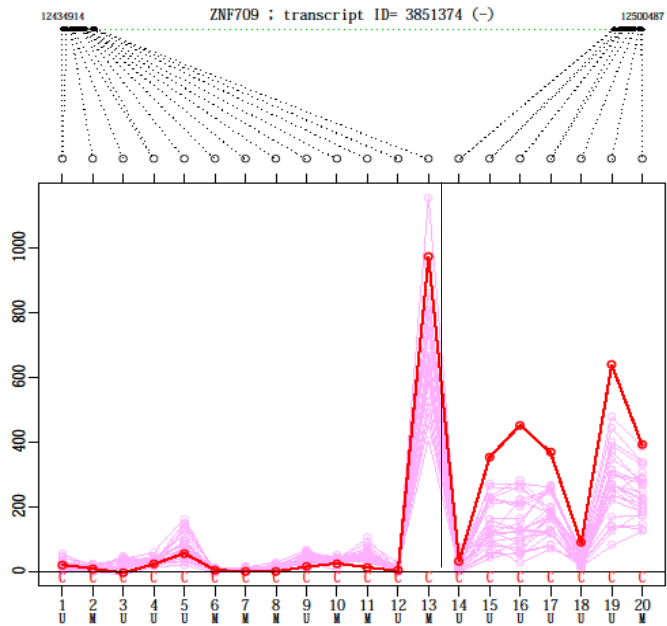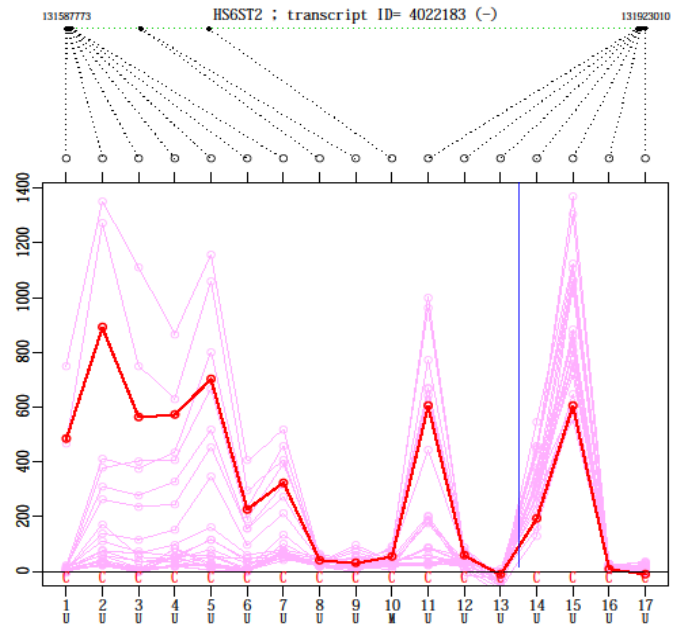

**Additional file 2 -6/6**  
 selected genes by the program in 20 pancreatic cell lines
